# Supplementary material for: Preparation, Characterization and In Vitro Stability of a Novel ACE-Inhibitory Peptide from Soybean Protein
Source: MDPI journal article supplement (doi:10.3390/foods11172667), 2022-09-01
Supplement: s1 [file s1]

Supplementary Materials

# Preparation, Characterization and In Vitro Stability of a Novel ACE-Inhibitory Peptide from Soybean Protein

Sara Sangiorgio <sup>1</sup>, Nikolina Vidović <sup>1</sup>, Giovanna Boschin <sup>2</sup>, Gilda Aiello <sup>2,3</sup>, Patrizia Arcidiaco <sup>4</sup>, Anna Arnoldi <sup>2</sup>, Carlo F. Morelli <sup>1</sup>, Marco Rabuffetti <sup>1</sup>, Teresa Recca <sup>4</sup>, Letizia Scarabattoli <sup>1</sup>, Daniela Ubiali <sup>5</sup> and Giovanna Speranza <sup>1,\*</sup>

<sup>1</sup> Department of Chemistry, University of Milan, via Golgi 19, 20133 Milan, Italy

<sup>2</sup> Department of Pharmaceutical Sciences, University of Milan, via L. Mangiagalli 25, 20133 Milan, Italy

<sup>3</sup> Department of Human Science and Quality of Life Promotion, Telematic University San Raffaele, 00166 Rome, Italy

<sup>4</sup> Centro Grandi Strumenti, University of Pavia, via Bassi 21, 27100 Pavia, Italy

<sup>5</sup> Department of Drug Sciences, University of Pavia, Viale Taramelli 12, 27100 Pavia, Italy

\* Correspondence: giovanna.speranza@unimi.it; Tel.: (+39)-02503-14097

## Supplementary Materials Summary

|                                                                                                          |    |
|----------------------------------------------------------------------------------------------------------|----|
| 1. Degree of Hydrolysis (DH)                                                                             | 2  |
| 1.1. Samples Preparation and Analysis                                                                    | 2  |
| 1.3. Amino Acids profile of SPI and Nitrogen Content of the Peptide Bonds (N <sub>pb</sub> ) Calculation | 3  |
| 1.4. Samples Analysis and Amino Nitrogen (AN) Calculation                                                | 4  |
| 2. Foaming Properties                                                                                    | 4  |
| 3. ACE-Inhibitory Activity Plots                                                                         | 5  |
| 4. RP-HPLC                                                                                               | 7  |
| 5. NMR Analysis: <sup>1</sup> H and TOCSY Spectra of A1 Fraction                                         | 7  |
| 6. Amino Acid Analysis                                                                                   | 8  |
| 7. Edman Degradation Analysis                                                                            | 9  |
| 8. Peptides Loading on Resin Support for Solid Phase Synthesis                                           | 14 |
| 9. Spectroscopic Characterization of Synthesized and In Vitro Digested Peptides                          | 14 |
| 9.1. ALKPDNR ESI-MS (Positive Detection)                                                                 | 14 |
| 9.2. VVPD ESI-MS (Positive Detection)                                                                    | 15 |
| 9.3. NDRP ESI-MS (Positive Detection)                                                                    | 16 |
| 9.4. NDTP ESI-MS (Positive Detection)                                                                    | 17 |
| 9.5. In Vitro Digested NDRP ESI-MS (Positive Detection)                                                  | 18 |
| 9.6. <sup>1</sup> H NMR of NDRP                                                                          | 19 |
| 9.7. <sup>13</sup> C NMR of NDRP                                                                         | 20 |
| 9.8. NDRP HR-MS (Positive Detection)                                                                     | 21 |

## 1. Degree of Hydrolysis (DH)

### 1.1. Samples Preparation and Analysis

Degree of hydrolysis (DH) of the obtained SPH (A, F, A+F) was determined using the trinitrobenzenesulfonic acid (TNBS) method. Briefly, an aliquot (250  $\mu$ L) of the examined sample solution prepared in SDS (1% *w/v*) was diluted in 0.21 M sodium phosphate buffer (pH 8.2) (2 mL) and TNBS aqueous solution (0.1% *w/v*) (2 mL) was added afterward. Tightly secured tubes containing samples were mixed and incubated in the dark, at 50 °C for 60 min. The reaction was stopped by the addition of 0.1 M HCl (4 mL). Samples were allowed to cool at room temperature for 30 minutes and then submitted to spectrophotometric analysis of absorbance at 340 nm, using a JASCO V-630 UV-VIS Spectrophotometer (JASCO Europe, Cremella, Italy). Each assay was performed in triplicate. L-Leucine (0–2 mM) was used to generate a standard curve.

### 1.2. Standard Curve Generation

L-Leucine (0–2 mM) was used to generate a standard curve.

**Table S1.** L-Leu samples analysis for calibration curve.

| [L-Leu] (mM) | A (AU) | Average A (AU) | Std. Dev. (AU) |
|--------------|--------|----------------|----------------|
| 0            | 0.0763 | 0.0533         | 0.0448         |
| 0.5          | 0.112  | 0.113          | 0.102          |
| 1            | 0.170  | 0.177          | 0.170          |
| 1.5          | 0.251  | 0.260          | 0.259          |
| 2            | 0.317  | 0.317          | 0.319          |

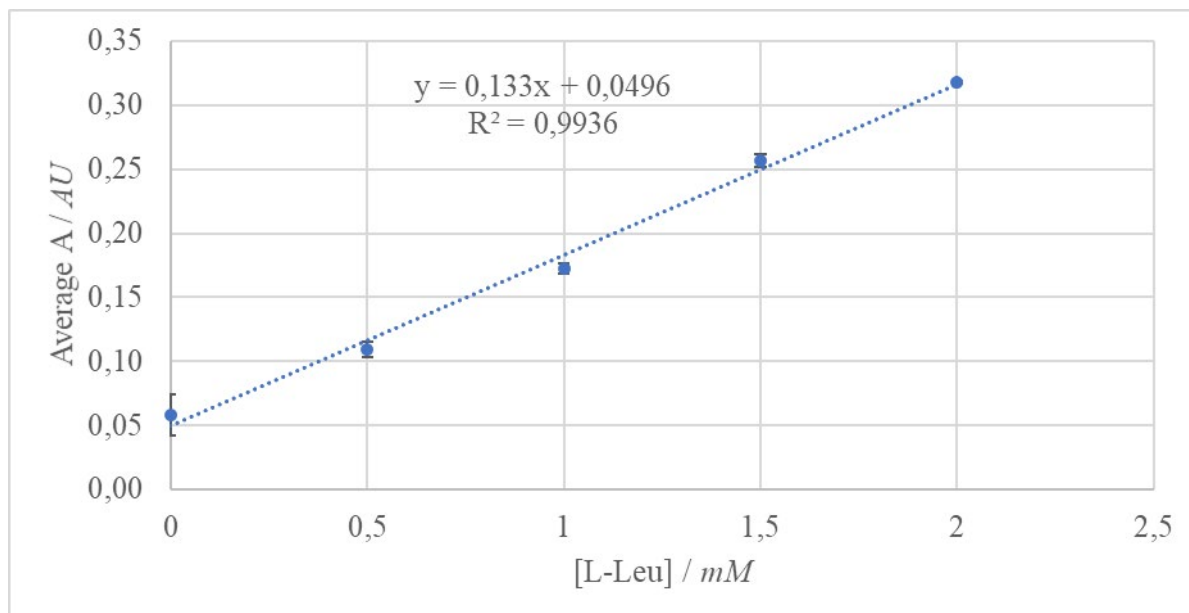

**Figure S1.** L-Leu calibration curve.

Moreover, the molecular mass of nitrogen (14.007 g mol<sup>-1</sup>) was multiplied by each concentration value of L-Leu. Thus, the absorbance values were related to the amino nitrogen content (AN) of each L-Leu sample, generating a second calibration curve.

**Table S2.** AN<sub>L-Leu</sub> calibration curve.

| AN <sub>L-Leu</sub> (mg L <sup>-1</sup> ) | Average A (AU) | Std. Dev. (AU) |
|-------------------------------------------|----------------|----------------|
| 0                                         | 0.0582         | 0.0163         |
| 7.0035                                    | 0.109          | 0.00601        |
| 14.007                                    | 0.172          | 0.00433        |
| 21.0105                                   | 0.257          | 0.00481        |
| 28.014                                    | 0.318          | 0.00124        |

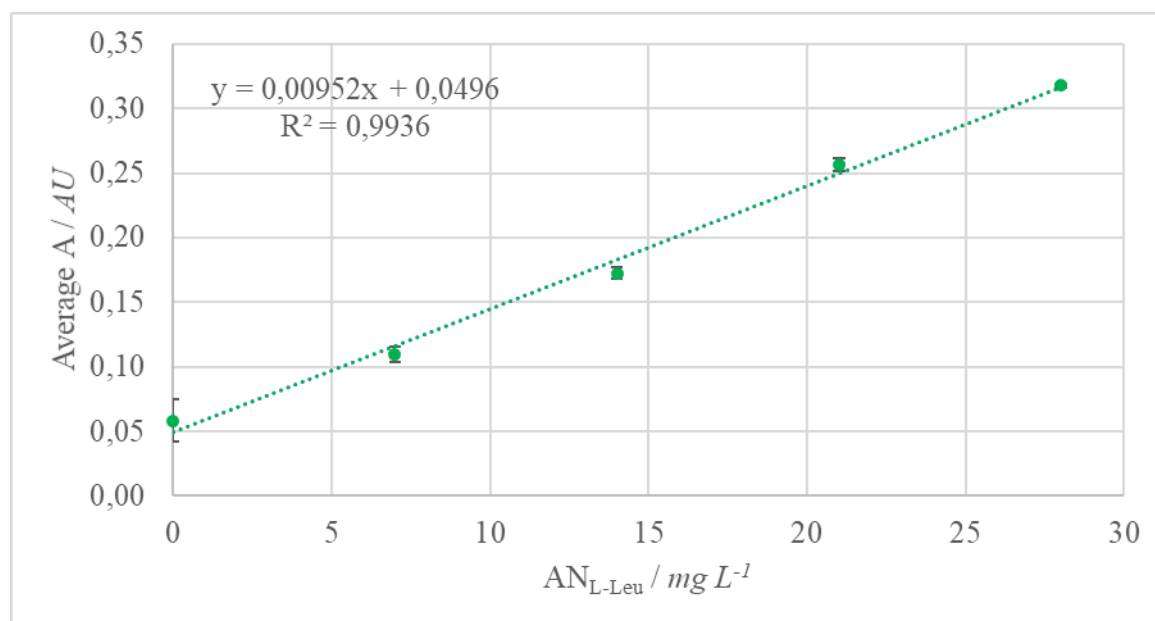**Figure S2.** AN<sub>L-Leu</sub> calibration curve.

### 1.3. Amino Acids Profile of SPI and Nitrogen Content of the Peptide Bonds ( $N_{pb}$ ) Calculation

The nitrogen content of the peptide bonds ( $N_{pb}$ ) in the protein substrate (SPI) was calculated by assuming that all the nitrogen content in the starting material was related to proteins and by multiplying the molecular mass of nitrogen (14.007 g mol<sup>-1</sup>) for the moles sum of each amino acid (AA) present in the SPI, as reported in the amino acids profile provided by the supplier.

**Table S3.** Amino acids profile of SPI and  $N_{pb}$  calculation.

| AA  | m (g 100g <sup>-1</sup> ) | MW (g mol <sup>-1</sup> ) | mol (mol 100g <sup>-1</sup> ) | mol sum (mol 100g <sup>-1</sup> ) | $N_{pb}$ (mg g <sup>-1</sup> ) |
|-----|---------------------------|---------------------------|-------------------------------|-----------------------------------|--------------------------------|
| Asp | 9.49                      | 133                       | 0.071                         | 0.63                              | 88.01                          |
| Thr | 3.11                      | 119                       | 0.026                         |                                   |                                |
| Ser | 4.27                      | 105                       | 0.041                         | 0.63                              | 88.01                          |
| Glu | 15.19                     | 146                       | 0.10                          |                                   |                                |
| Gly | 3.31                      | 75                        | 0.044                         | 0.63                              | 88.01                          |
| Ala | 3.8                       | 89                        | 0.043                         |                                   |                                |
| Val | 4.45                      | 117                       | 0.038                         | 0.63                              | 88.01                          |
| Met | 1.3                       | 149                       | 0.009                         |                                   |                                |
| Ile | 3.48                      | 131                       | 0.027                         | 0.63                              | 88.01                          |
| Leu | 6.43                      | 131                       | 0.049                         |                                   |                                |
| Tyr | 3.31                      | 181                       | 0.018                         | 0.63                              | 88.01                          |
| Phe | 4.33                      | 165                       | 0.026                         |                                   |                                |
| Lys | 5.2                       | 146                       | 0.036                         | 0.63                              | 88.01                          |
| His | 2.06                      | 155                       | 0.013                         |                                   |                                |

|     |      |     |        |
|-----|------|-----|--------|
| Arg | 6.18 | 174 | 0.036  |
| Pro | 3.99 | 115 | 0.035  |
| Trp | 1.25 | 204 | 0.0061 |
| Cys | 0.86 | 121 | 0.0071 |

#### 1.4. Samples Analysis and Amino Nitrogen (AN) Calculation

**Table S4.** Starting isolate soy proteins (SPI) and hydrolysates samples (A; F; A+F) analysis.

| Sample | A (AU) |        |        | Average A (AU) | Dev. Std. (AU) |
|--------|--------|--------|--------|----------------|----------------|
| SPI    | 0.0701 | 0.0620 | 0.0652 | 0.0658         | 0.00407        |
| A      | 0.165  | 0.180  | 0.174  | 0.173          | 0.00716        |
| F      | 0.283  | 0.278  | 0.277  | 0.279          | 0.00324        |
| F+A    | 0.261  | 0.265  | 0.265  | 0.264          | 0.00237        |

The slope and the intercept of the AN<sub>L-Leu</sub> calibration curve equation are used calculate both the amino nitrogen of the protein substrate before hydrolysis (AN<sub>1</sub>) and the amino nitrogen content of the protein substrate after hydrolysis (AN<sub>2</sub>), which must be expressed as mg g<sup>-1</sup> of proteins.

**Table S5.** AN calculation.

| Sample | AN (mg L <sup>-1</sup> ) | AN error (mg L <sup>-1</sup> ) | [Conc.] (mg mL <sup>-1</sup> ) | AN (mg g <sup>-1</sup> ) | AN error (mg g <sup>-1</sup> ) |
|--------|--------------------------|--------------------------------|--------------------------------|--------------------------|--------------------------------|
| SPI    | 1.70                     | 1.31                           | 0.74                           | 2.30                     | 1.77                           |
| A      | 13.0                     | 2.16                           | 0.74                           | 17.5                     | 2.92                           |
| F      | 24.1                     | 2.26                           | 0.74                           | 32.6                     | 3.05                           |
| F+A    | 22.5                     | 2.10                           | 0.66                           | 34.1                     | 3.17                           |

#### 1.5. Degree of Hydrolysis (DH) Calculation

DH values were calculated using the following equation:

$$\text{DH (\%)} = 100 \left( \frac{\text{AN}_2 - \text{AN}_1}{\text{N}_{\text{pb}}} \right) \quad (1)$$

**Table S6.** DH calculation.

| Sample | DH (%) | DH error (%) |
|--------|--------|--------------|
| A      | 17     | 5            |
| F      | 34     | 5            |
| F+A    | 36     | 6            |

## 2. Foaming Properties

Foaming capacity (FC) was determined as the measure of the foam volume (FV) generated by SPH aqueous solutions (10% w/v) present in a 100 mL graduated cylinder after flushing with a constant and homogeneous nitrogen flow (1.5 L min<sup>-1</sup>, 5 minutes). To check the foam stability (FS), foam volumes were recorded at 1-, 5-, 10- and 30-minutes intervals (FV<sub>i</sub>). FC and FS were calculated according to the following equations:

$$\text{FC} = (\text{FV} / \text{FV}_R) \times 100; \quad \text{FS} = (\text{FV}_i / \text{FV}_0) \times 100. \quad (2)$$

where FV<sub>R</sub> represents to the foam volume generated by a reference human serum albumin aqueous solution (2% w/v) submitted to the same conditions and FV<sub>0</sub> is the starting foam volume.

**Table S7.** Foaming capacity (FC) and foaming stability (FS) over time.

|     | FC (%) | 1 min FS (%) | 5 min FS (%) | 10 min FS (%) | 30 min FS (%) |
|-----|--------|--------------|--------------|---------------|---------------|
| A   | 91     | 15           | 7            | -             | -             |
| F   | 73     | 36           | 16           | 15            | 9             |
| A+F | 53     | 13           | -            | -             | -             |

### 3. ACE-Inhibitory Activity Plots

ACE-inhibitory activity plots were constructed by evaluating hippuric acid formation from hippuryl-histidyl-leucine, a mimic substrate for angiotensin I, by HPLC analysis at different concentrations of inhibitor (0, 86.3, 172.5, 345.1, 690.1, 1035.2  $\mu\text{g mL}^{-1}$ ).

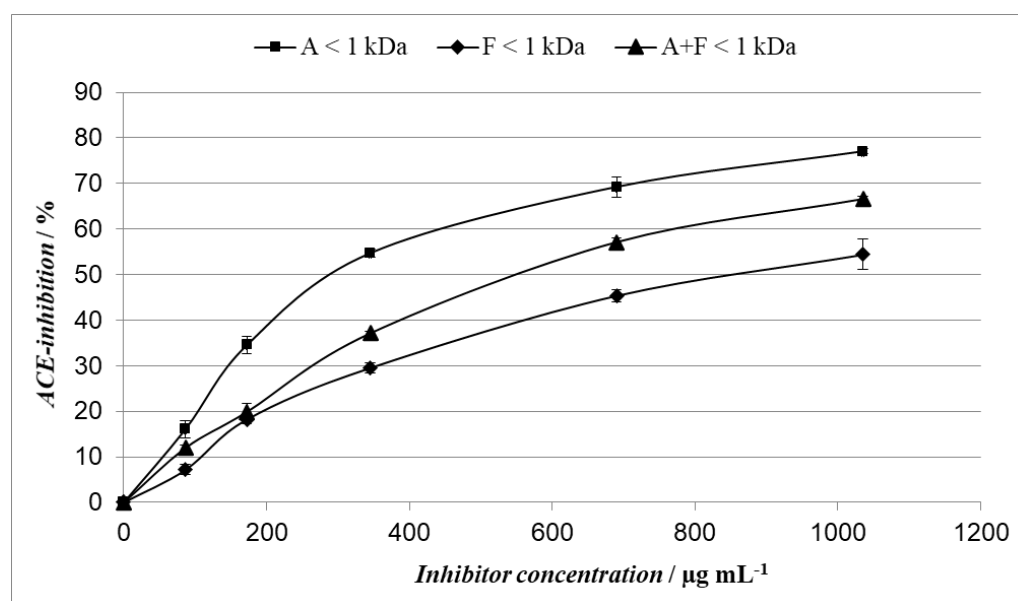

**Figure S3.** ACE-inhibitory activity curves comparison of ultrafiltered hydrolysates A < 1 kDa, F < 1 kDa and A+F < 1 kDa. .

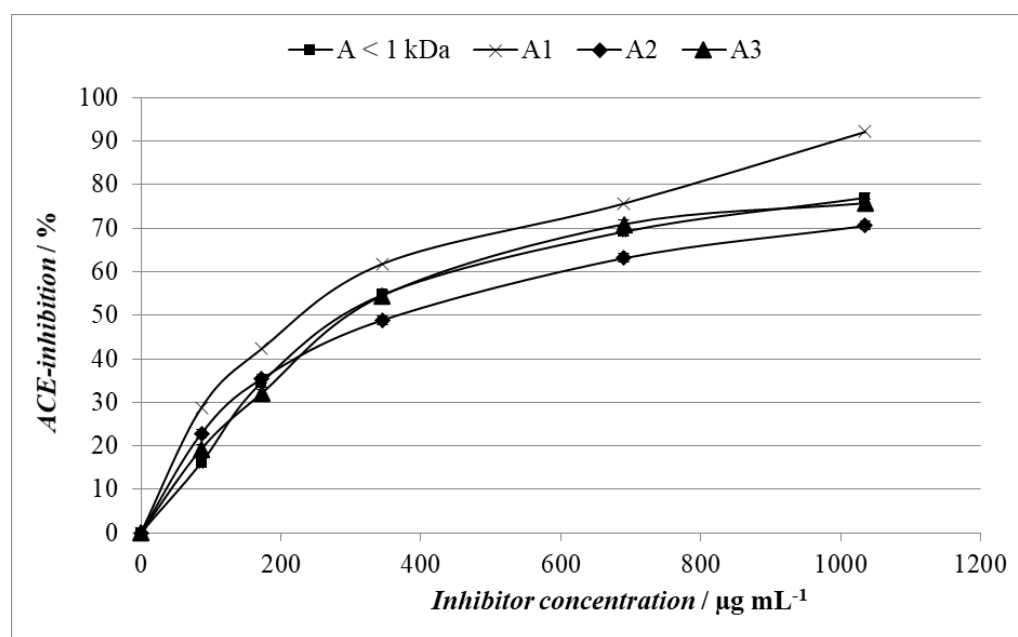

**Figure S4.** ACE-inhibitory activity curves comparison of ultrafiltered hydrolysates A < 1 kDa and fractions purified via semipreparative RP-HPLC from A < 1 kDa (A1, A2 and A3).

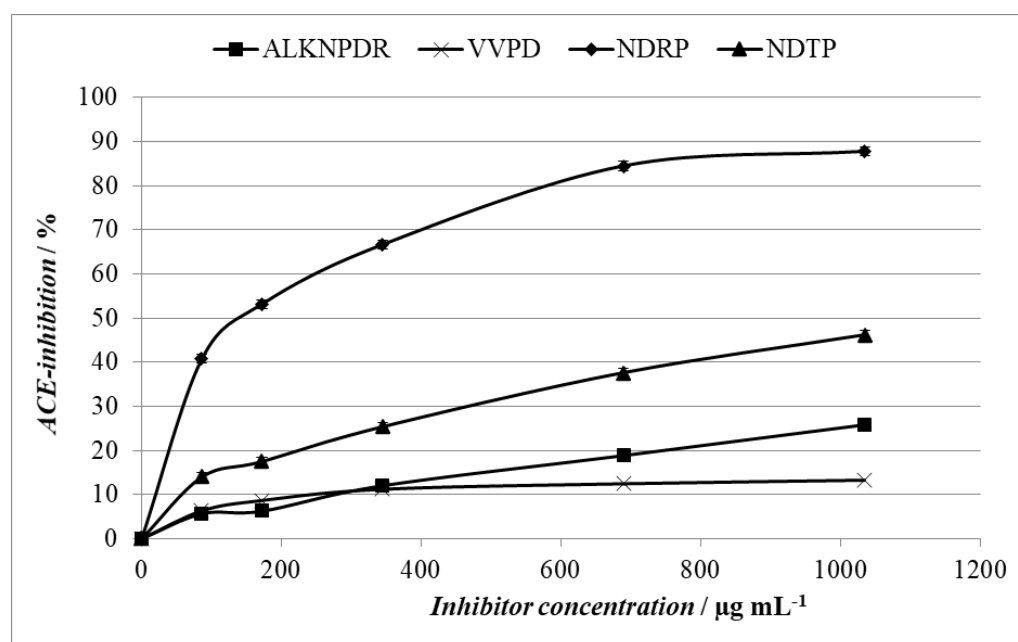

**Figure S5.** ACE-inhibitory activity curves comparison of synthesized peptides (ALKPNDR, VVPD, NDRP and NDTP).

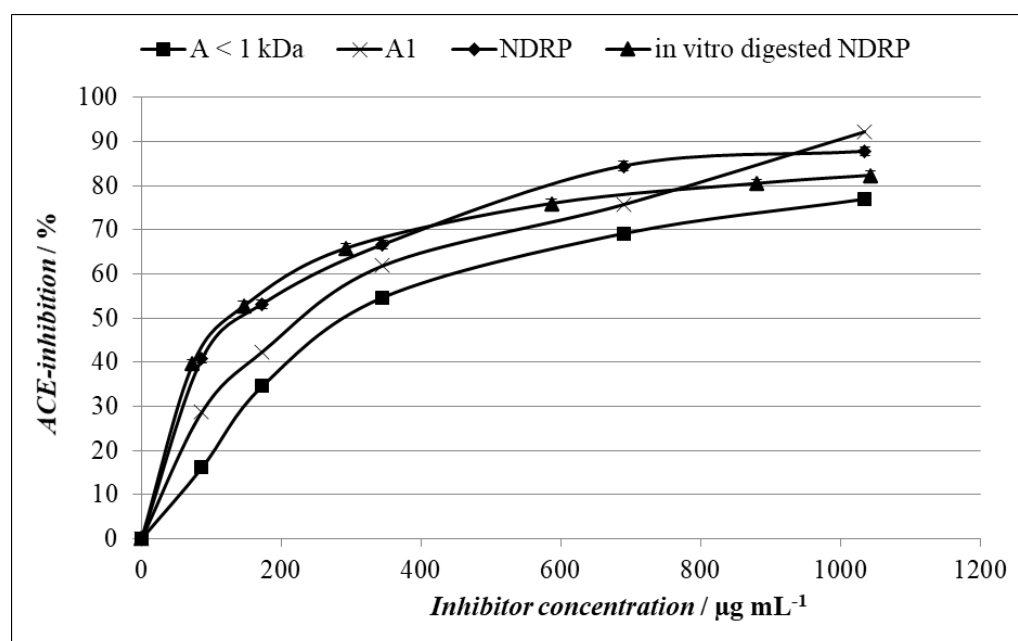

**Figure S6.** ACE-inhibitory activity curves comparison of ultrafiltered hydrolysates A < 1 kDa, purified fraction A1, synthesized peptide NDRP and in vitro digested NDRP.

#### 4. RP-HPLC

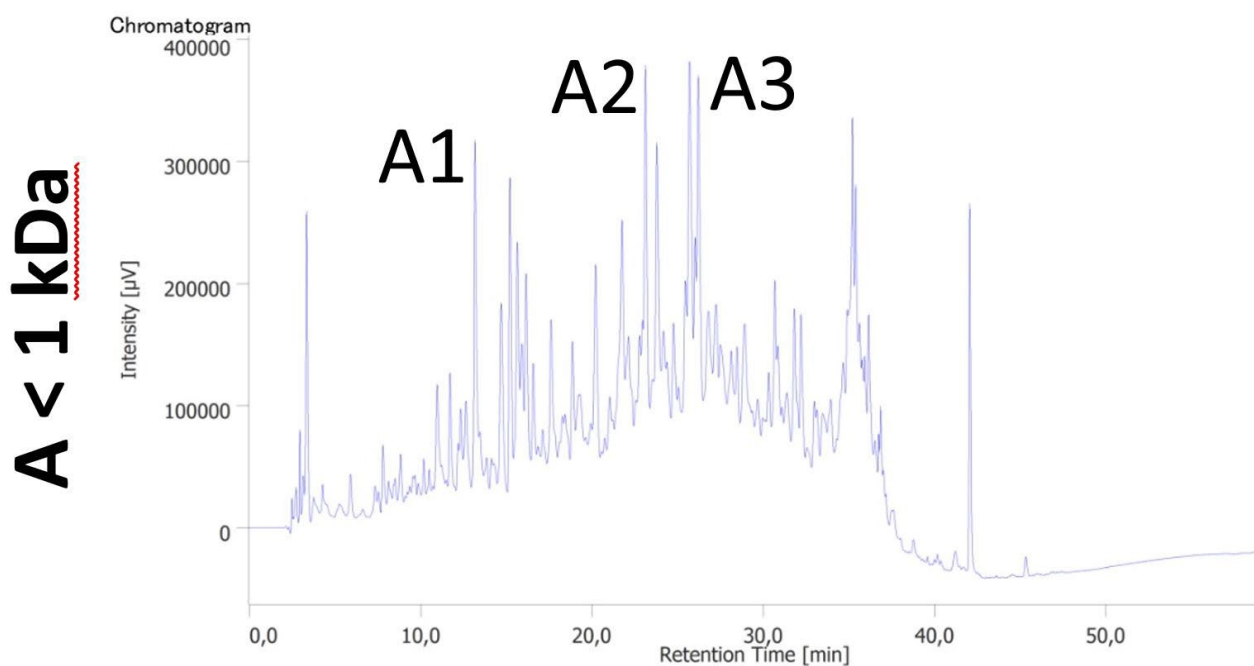

**Figure S7.** RP-HPLC chromatogram on reverse phase Jupiter 10  $\mu\text{m}$  Proteo 90 Å column of active fraction A < 1 kDa.

#### 5. NMR Analysis: $^1\text{H}$ and TOCSY Spectra of A1 Fraction

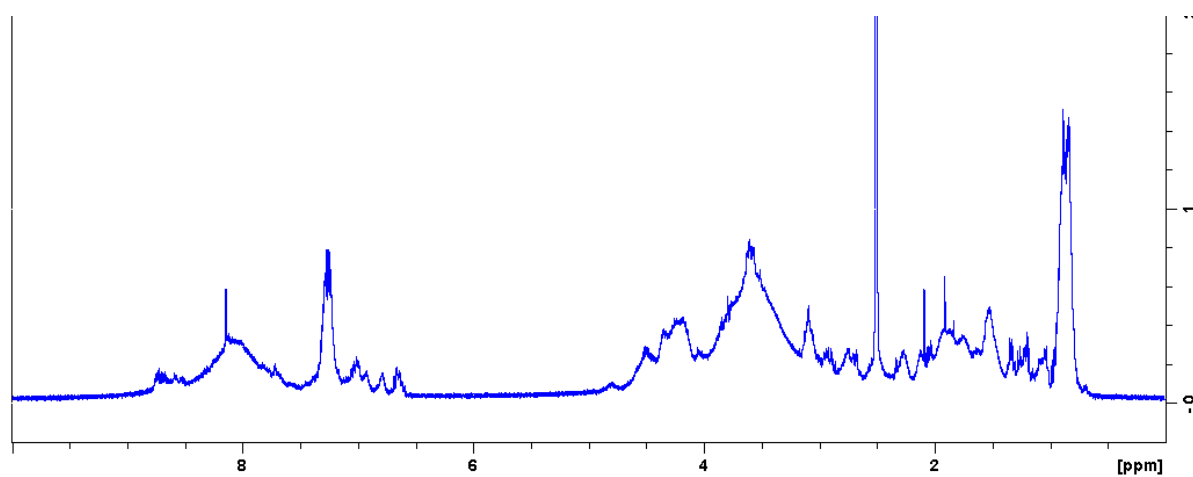

**Figure S8.**  $^1\text{H}$  NMR (400 MHz;  $\text{DMSO}-d_6$ ) spectrum of A1 sample.

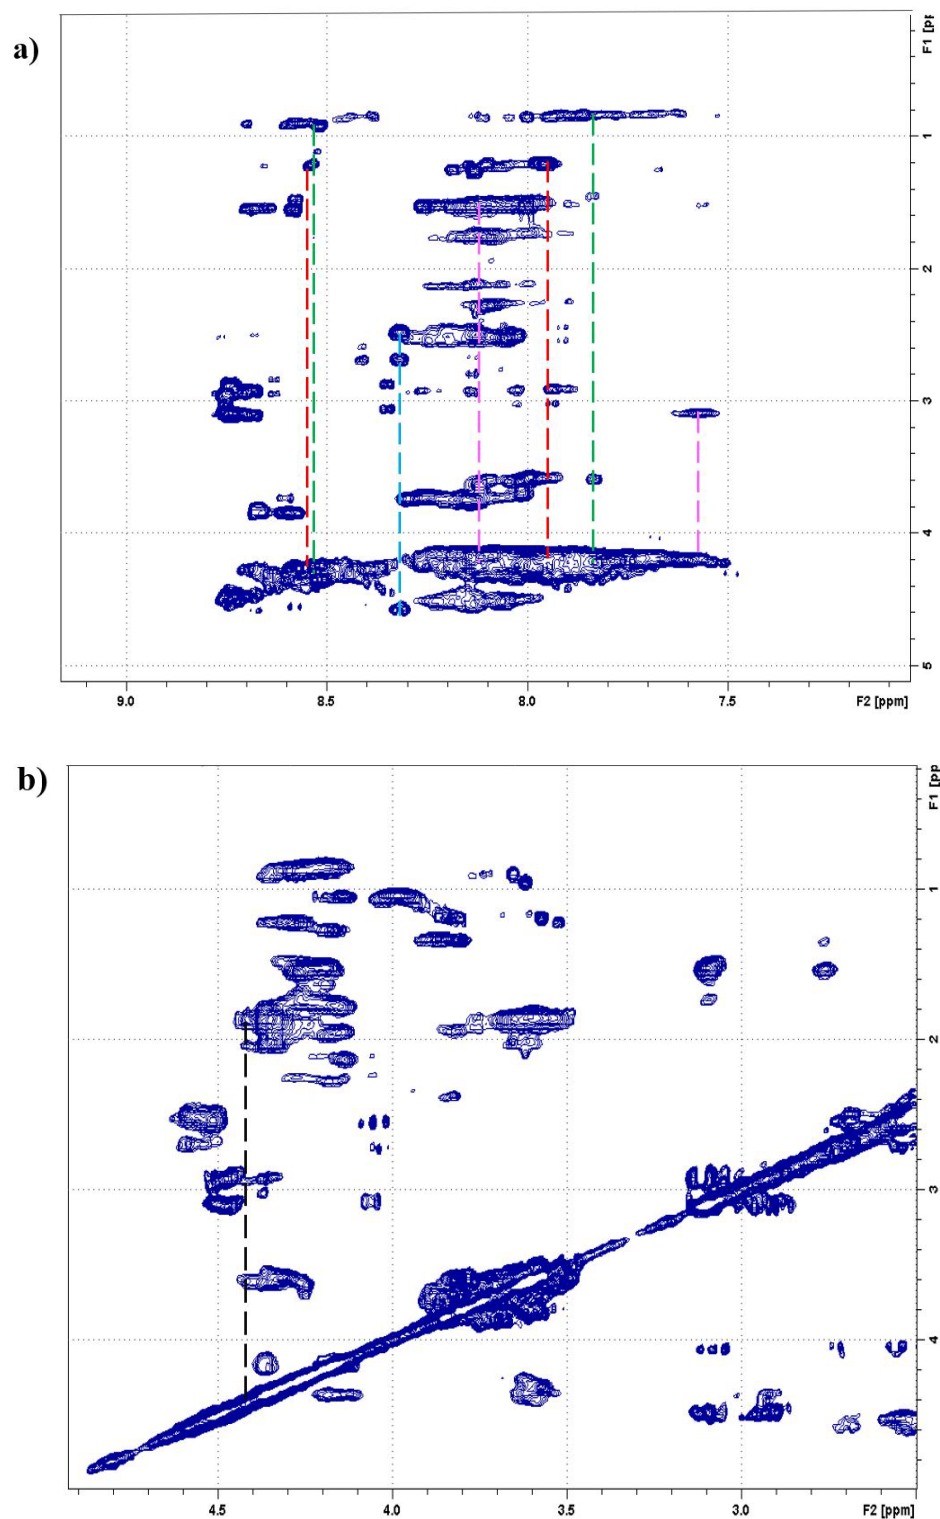

**Figure S9.** (a) NH-αH region and (b) αH-αH region of the TOCSY spectrum of the A1 sample; dashed lines correspond to the patterns of alanine (red), valine (green), aspartic acid (blue), arginine (pink) and proline (black).

## 6. Amino Acid Analysis

Fraction A1 (1.6717 mg) was hydrolysed in 6M HCl at 110 °C under nitrogen for 24 h in sealed tube. After hydrolysis, it was derivatized with orthophthalaldelyde (OPA) and 9-fluorenylmethyl chloroformate (Fmoc). OPA and Fmoc derivatives were analyzed by



Jasco X-LC Amino Acid Analyzer (Jasco Corporation, Tokyo, Japan) with a fluorescence detector (Jasco X-LCTM 3020FP) (excitation/emission at  $\lambda$  340/446 nm and at  $\lambda$  268/308 nm for OPA-amino acids and for Fmoc- amino acids, respectively). The amino acid analysis was performed in triplicate. Data were analyzed using chromatography software Chrom-NAV.

**Table S8.** Amino acids profile of A1.

| Amino Acid (AA)           | w <sub>AA</sub> (mg) | w <sub>AA</sub> / w <sub>tot</sub> % |
|---------------------------|----------------------|--------------------------------------|
| Asp                       | 0.1646               | 8.482                                |
| Glu                       | 0.3562               | 18.363                               |
| Ser                       | 0.0926               | 4.775                                |
| Hys                       | 0.0454               | 2.340                                |
| Gly                       | 0.0728               | 3.750                                |
| Thr                       | 0.0660               | 3.402                                |
| Ala                       | 0.0685               | 3.532                                |
| Arg                       | 0.1379               | 7.109                                |
| Tyr                       | 0.0539               | 2.779                                |
| Val                       | 0.0822               | 4.236                                |
| Met                       | 0.0231               | 1.192                                |
| Phe                       | 0.0917               | 4.725                                |
| Ile                       | 0.0826               | 4.256                                |
| Leu                       | 0.1355               | 6.987                                |
| Lys                       | 0.1207               | 6.223                                |
| Pro                       | 0.0780               | 4.021                                |
| w <sub>tot</sub> = 1.6717 |                      | ratio % tot = 86.172                 |

## 7. Edman Degradation Analysis

For amino acid sequence determination, fraction A1 was submitted to automatic Edman degradation (G1000A Hewlett Packard) according to manufacturer methods.

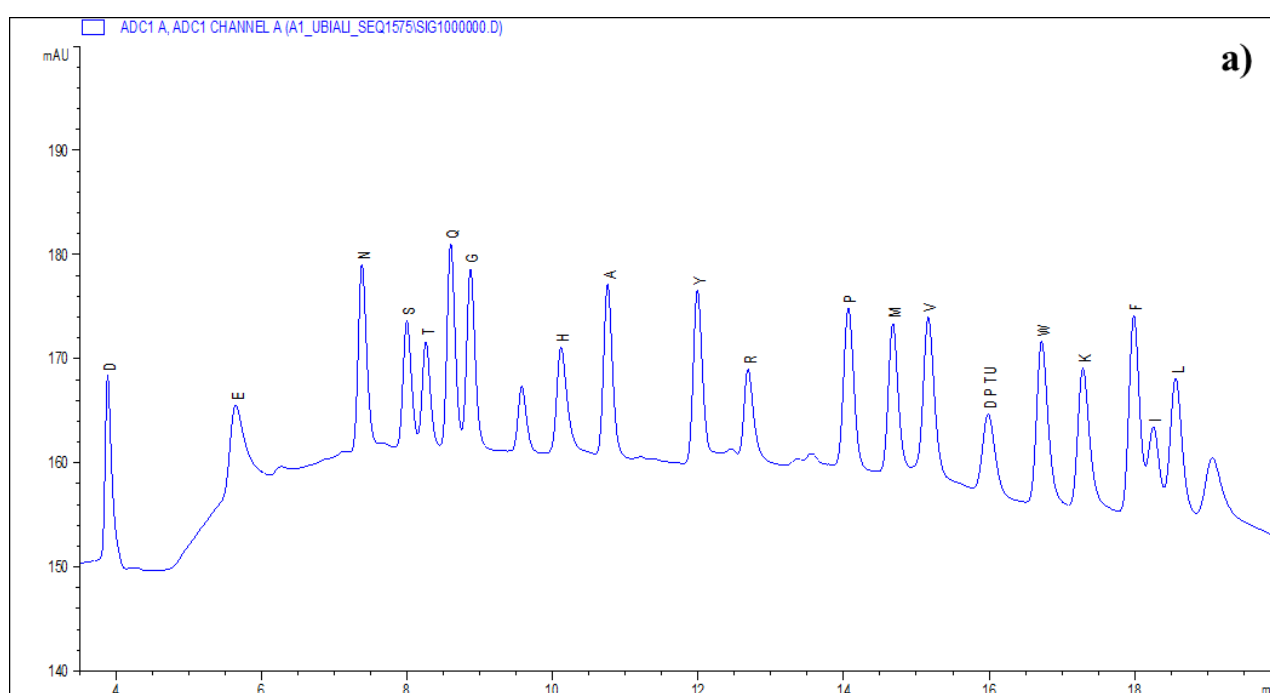

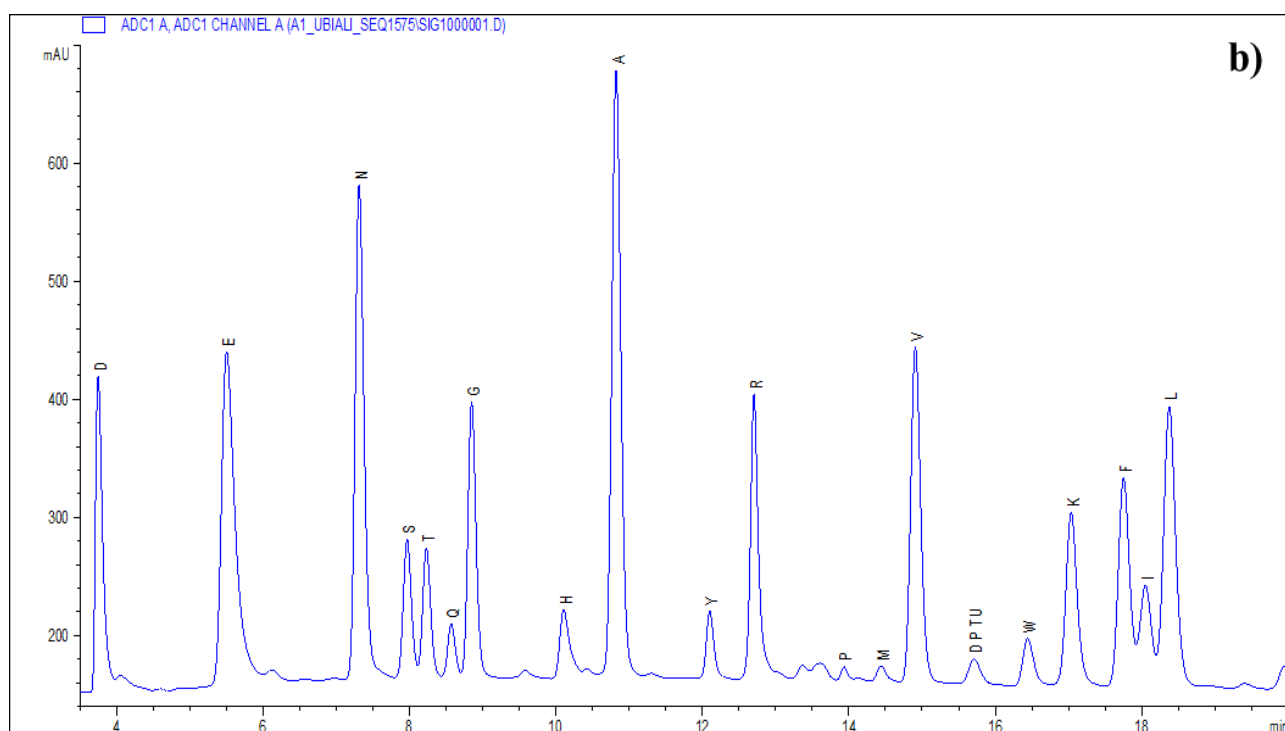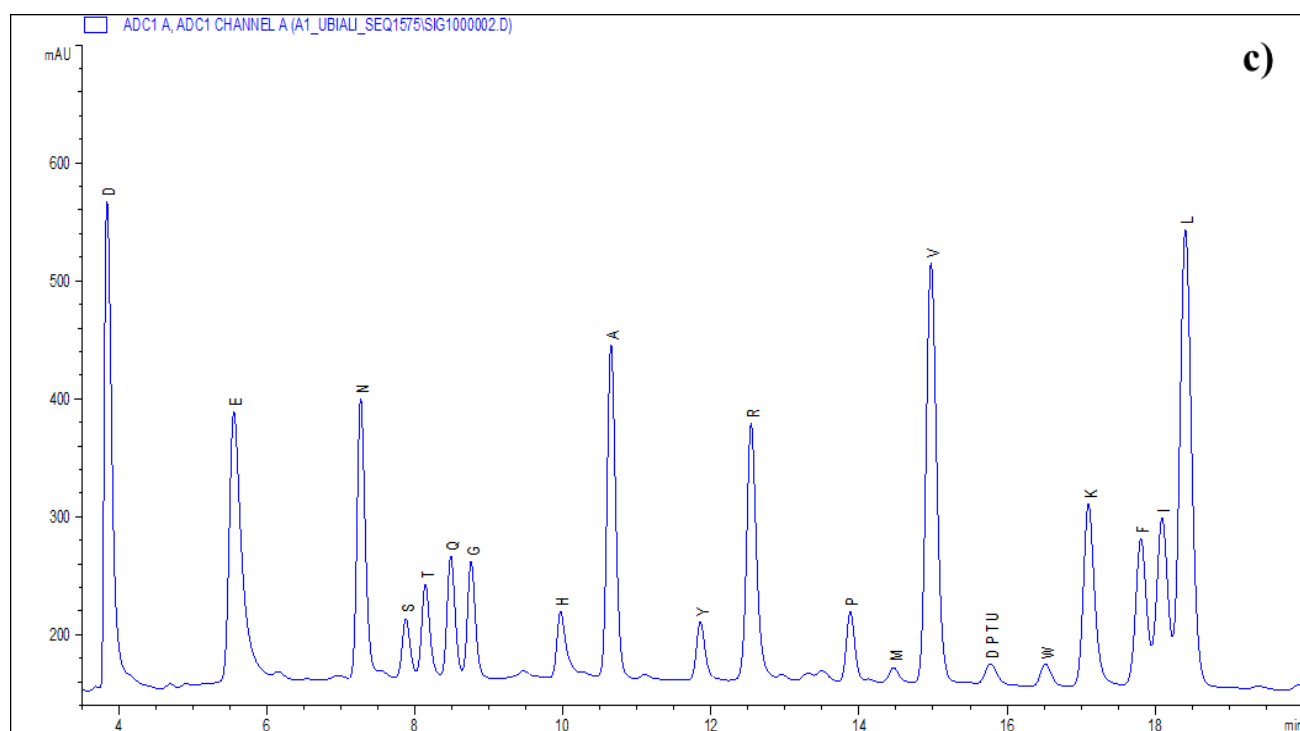

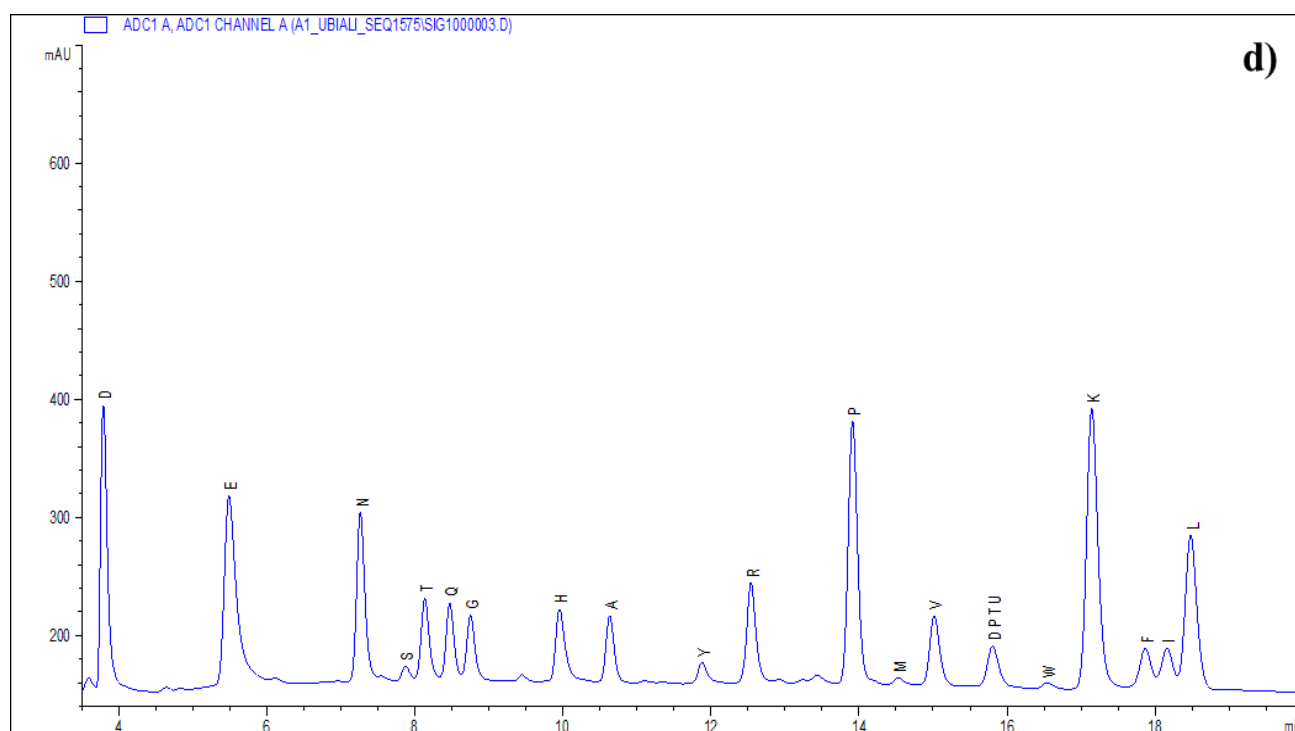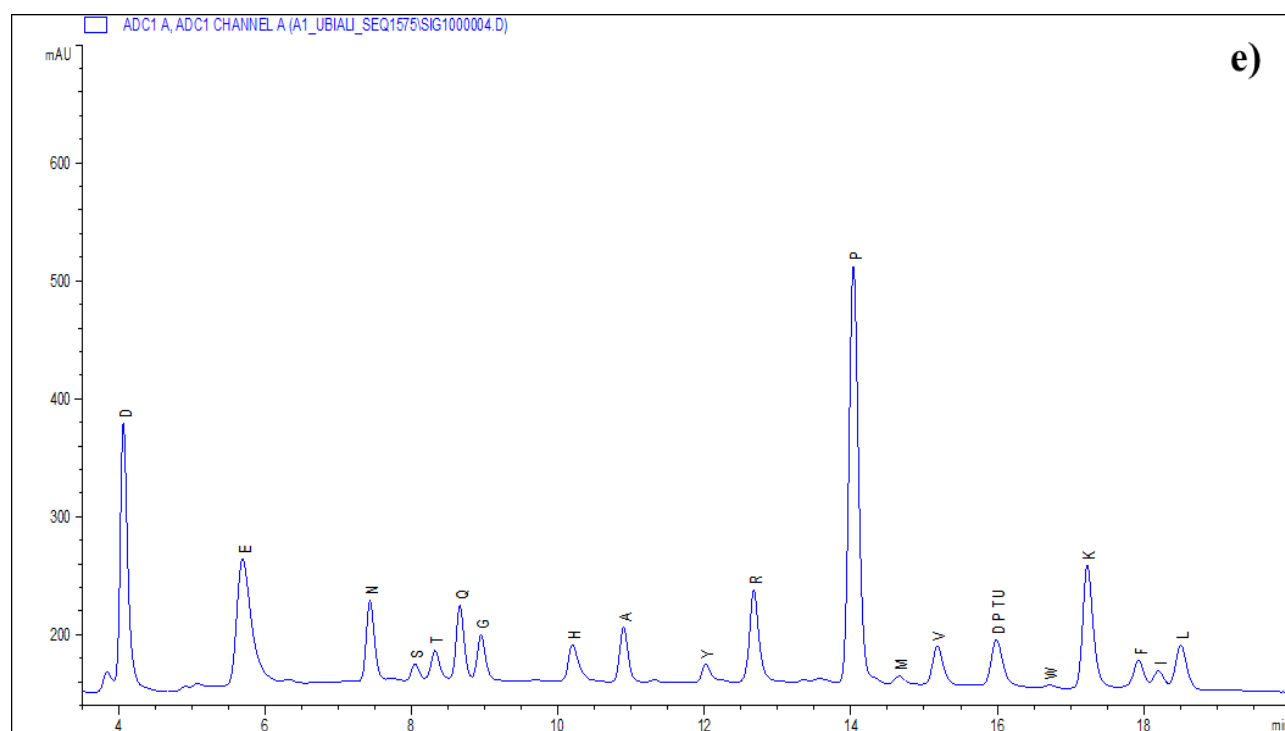

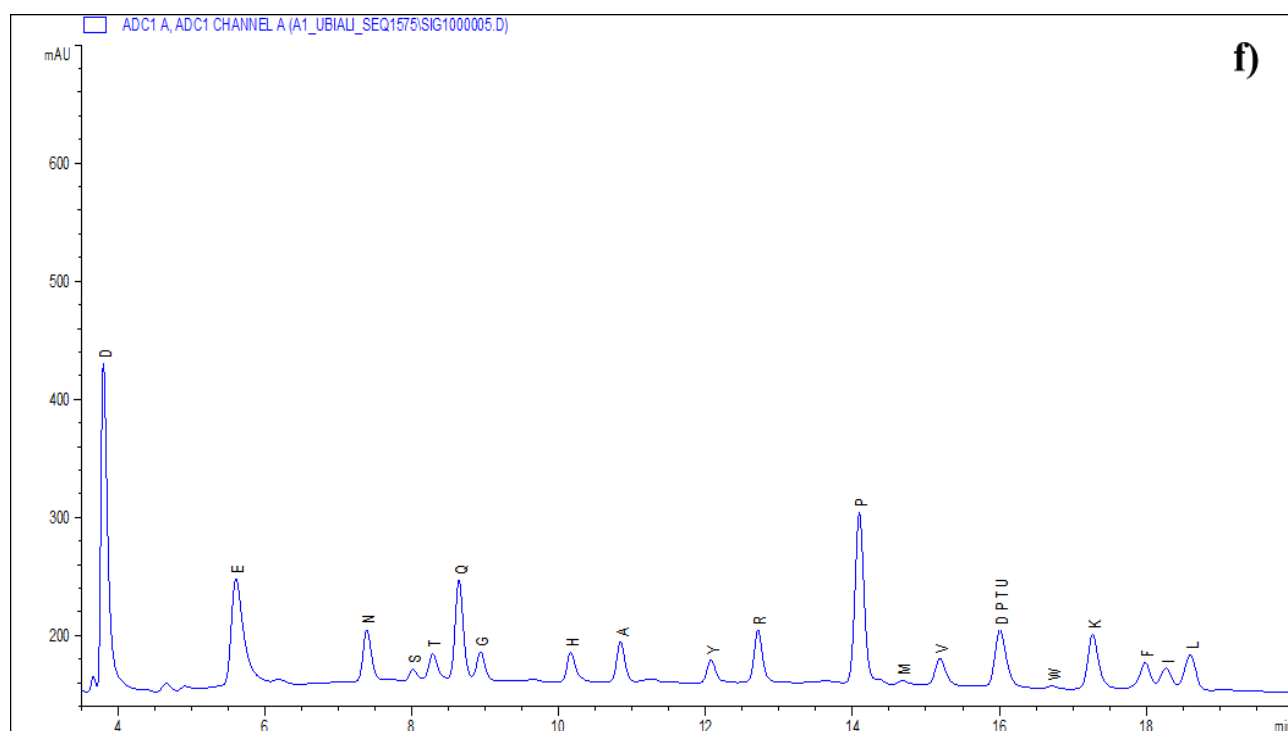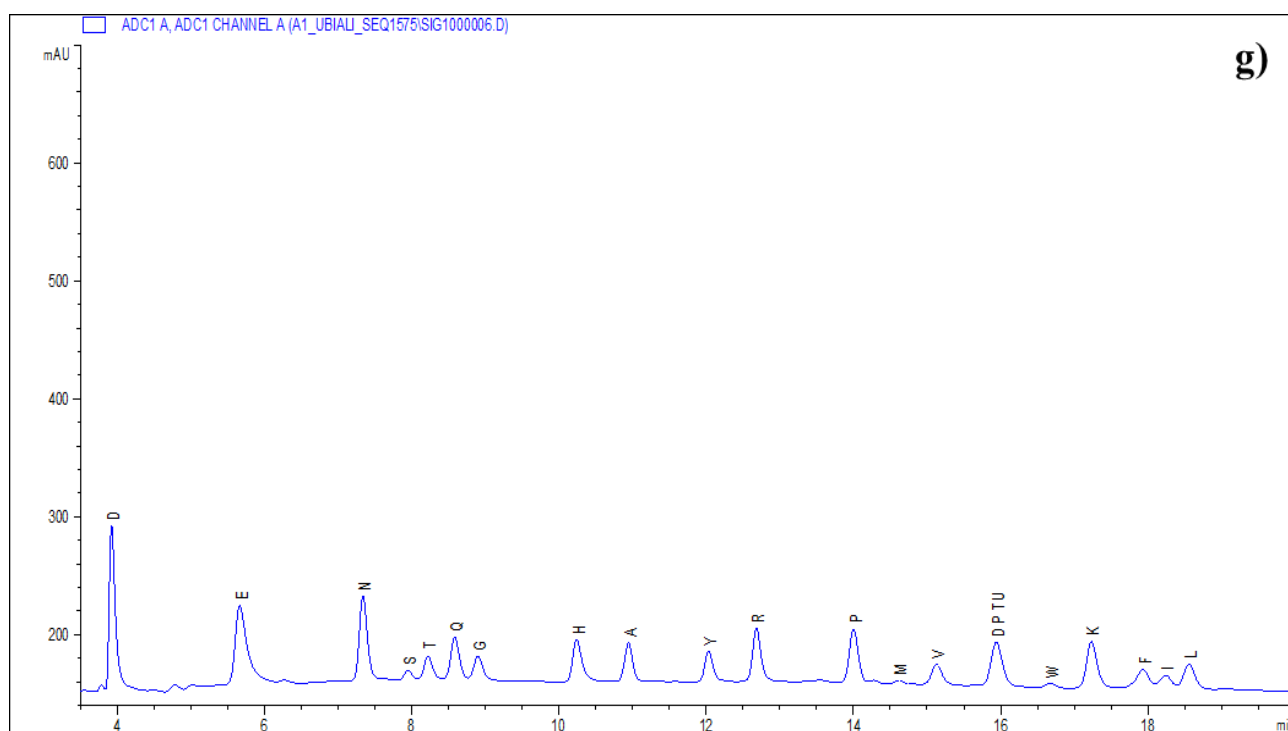

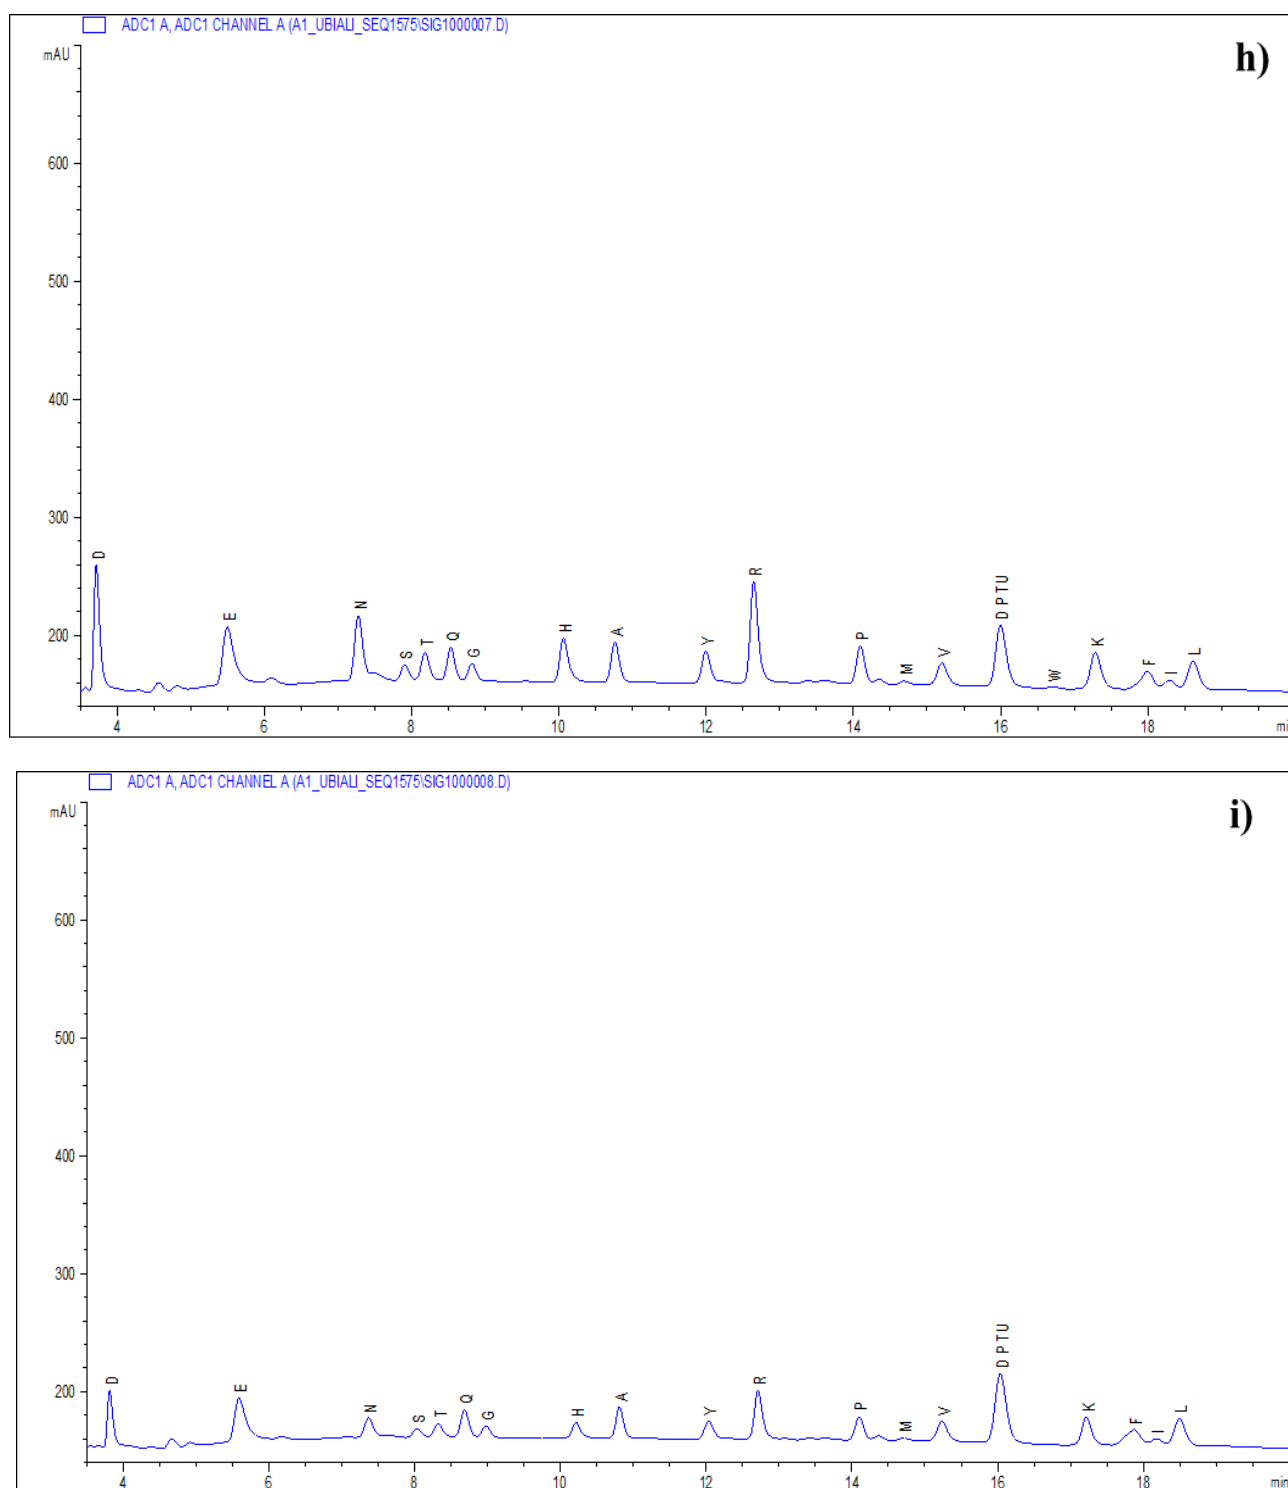

**Figure S10.** HPLC chromatograms of (a) PTH-Std and (b), (c), (d), (e), (f), (g), (h), (i) 8 cycles of Edman degradation.

## 8. Peptides Loading on Resin Support for Solid Phase Synthesis

In a plastic syringe equipped with a filter, 2-chlorotriyl chloride resin (500 mg, loading: 1.6 mmol/g) was suspended in anhydrous dichloromethane (DCM) (3 mL) and stirred for 1 h. Depending on the peptide, Fmoc-Arg(Pbf)-OH (390 mg, 0.6 mmol), Fmoc-Asp(OtBu)-OH (247 mg, 0.6 mmol), or Fmoc-Pro-OH (253 mg, 0.75 mmol) and *N,N*-diisopropylethylamine (DIPEA) (0.53 mL, 3 mmol) were added and the mixture was stirred for 1.5 hours. In the case of proline, a second loading was performed in the same condition to ensure the loading of the first amino acid to the resin. Solvent was then removed and resins were washed using a DCM/MeOH/DIPEA (17:2:1) mixture (3 × 3 mL), DCM (3 × 3 mL), *N,N*-dimethylformamide (DMF) (2 × 3 mL) and DCM again (2 × 3 mL) and finally dried under vacuum condition. 629 mg, 640 mg and 727 mg of dry resins were obtained, corresponding to a Fmoc-Arg(Pbf)-OH, Fmoc-Asp(OtBu)-OH and Fmoc-Pro-OH loading of about 0.88, 0.68 and 1.34 mmol/g, respectively.

## 9. Spectroscopic Characterization of Synthesized and In Vitro Digested Peptides

Synthesized peptides were submitted to electrospray ionization mass spectroscopy (ESI-MS),  $^1\text{H}$  NMR,  $^{13}\text{C}$  NMR and high-resolution mass spectroscopy (HR-MS) analysis.

### 9.1. ALKPDNR ESI-MS (Positive Detection)

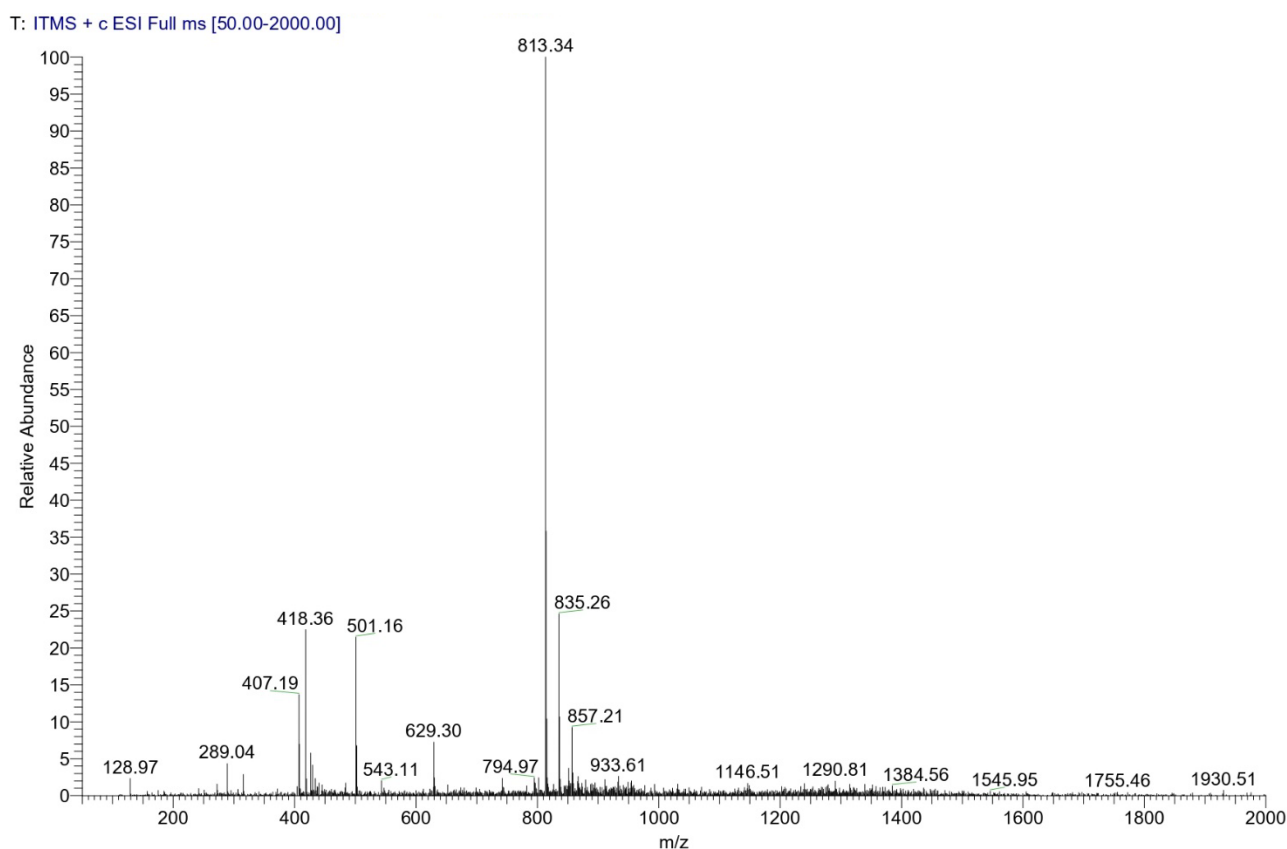

**Figure S11.** Mass spectra of ALKPDNR carried out in positive ion mode.

## 9.2. VVPD ESI-MS (Positive Detection)

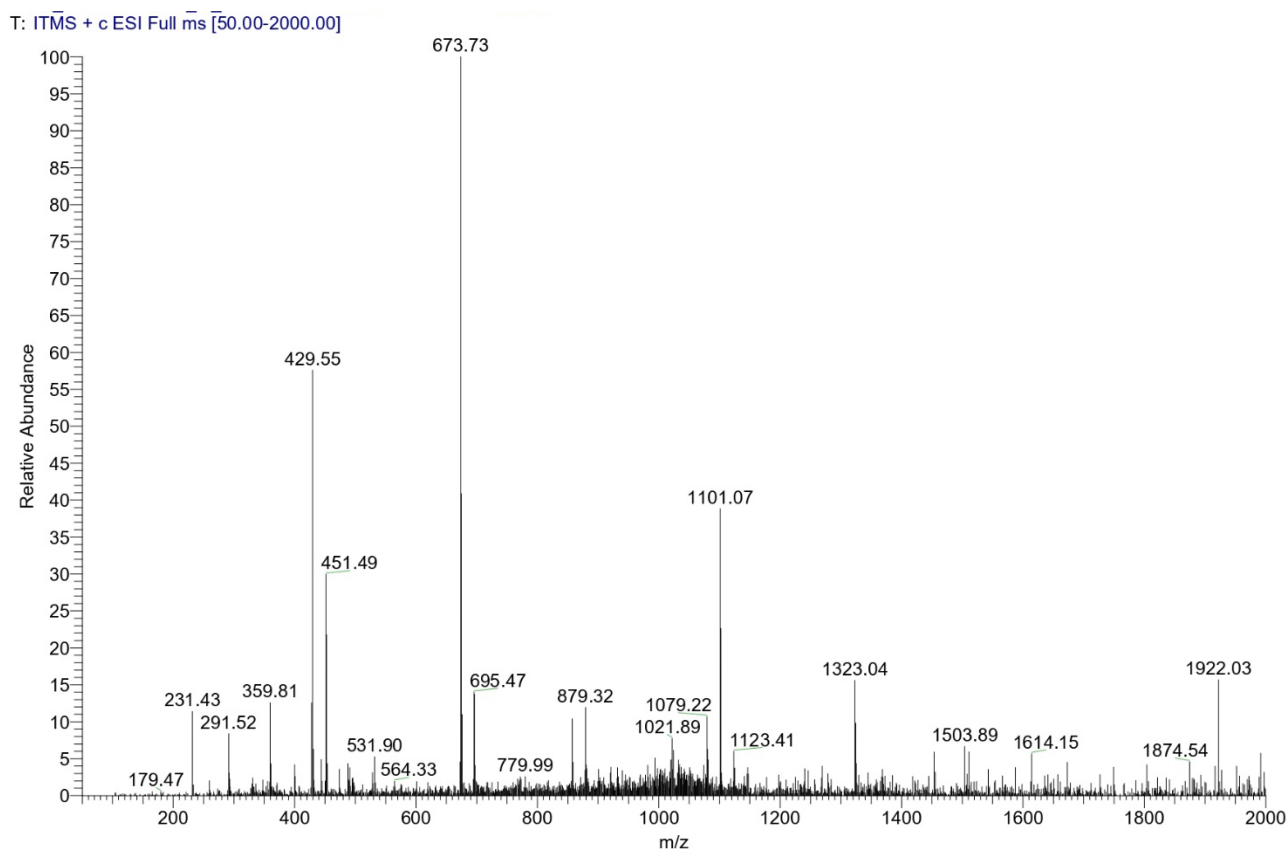

**Figure S12.** Mass spectra of VVPD carried out in positive ion mode.

## 9.3. NDRP ESI-MS (Positive Detection)

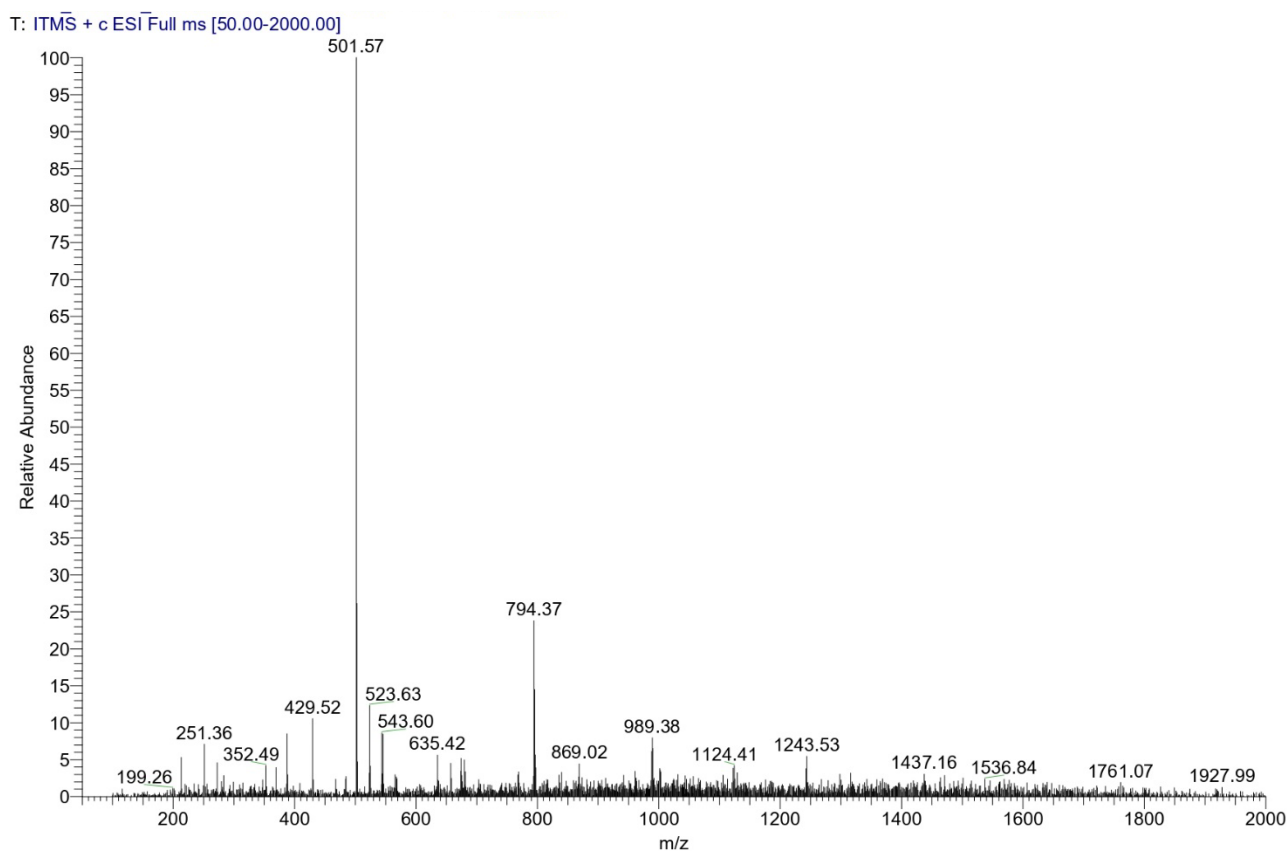

**Figure S13.** Mass spectra of NDRP carried out in positive ion mode.



## 9.4. NDTP ESI-MS (Positive Detection)

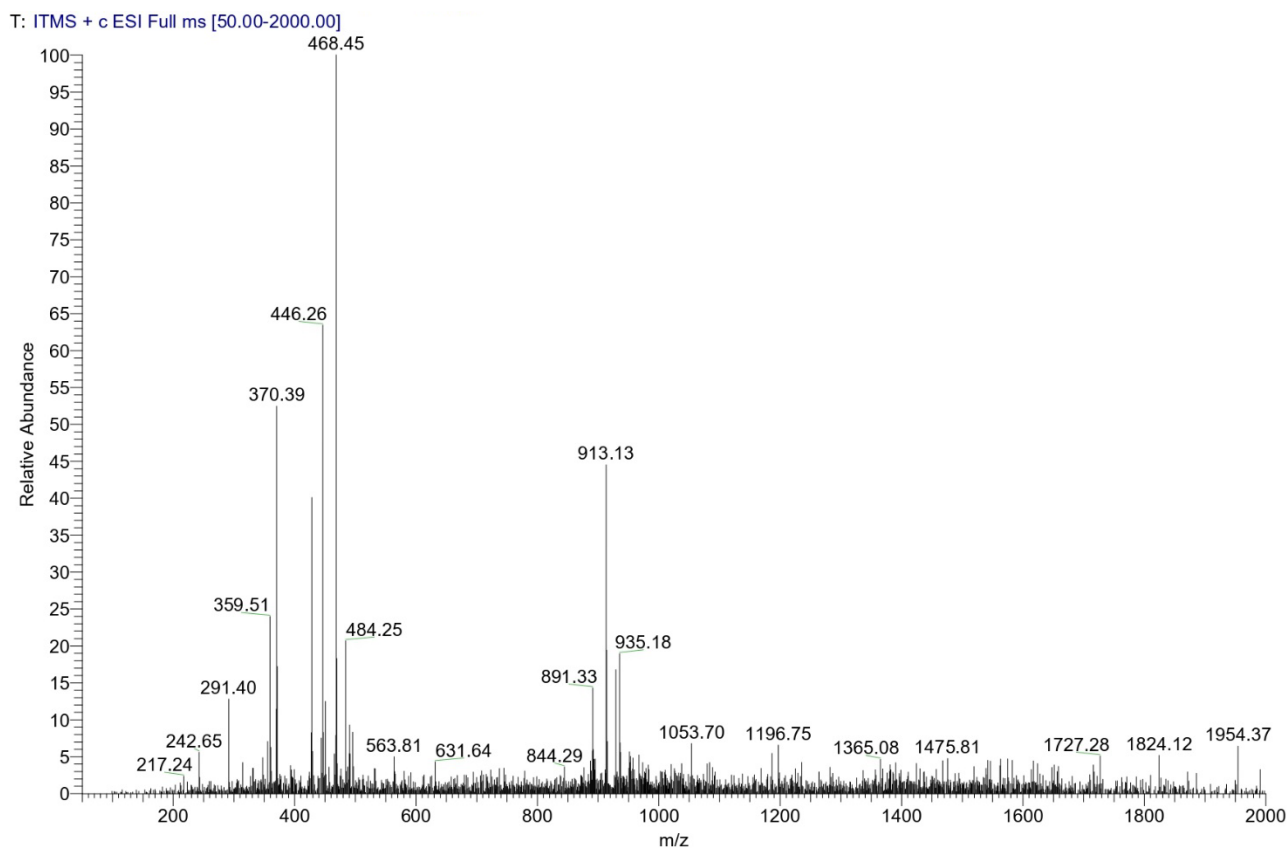

**Figure S14.** Mass spectra of NDTP carried out in positive ion mode.

### 9.5. In Vitro Digested NDRP ESI-MS (Positive Detection)

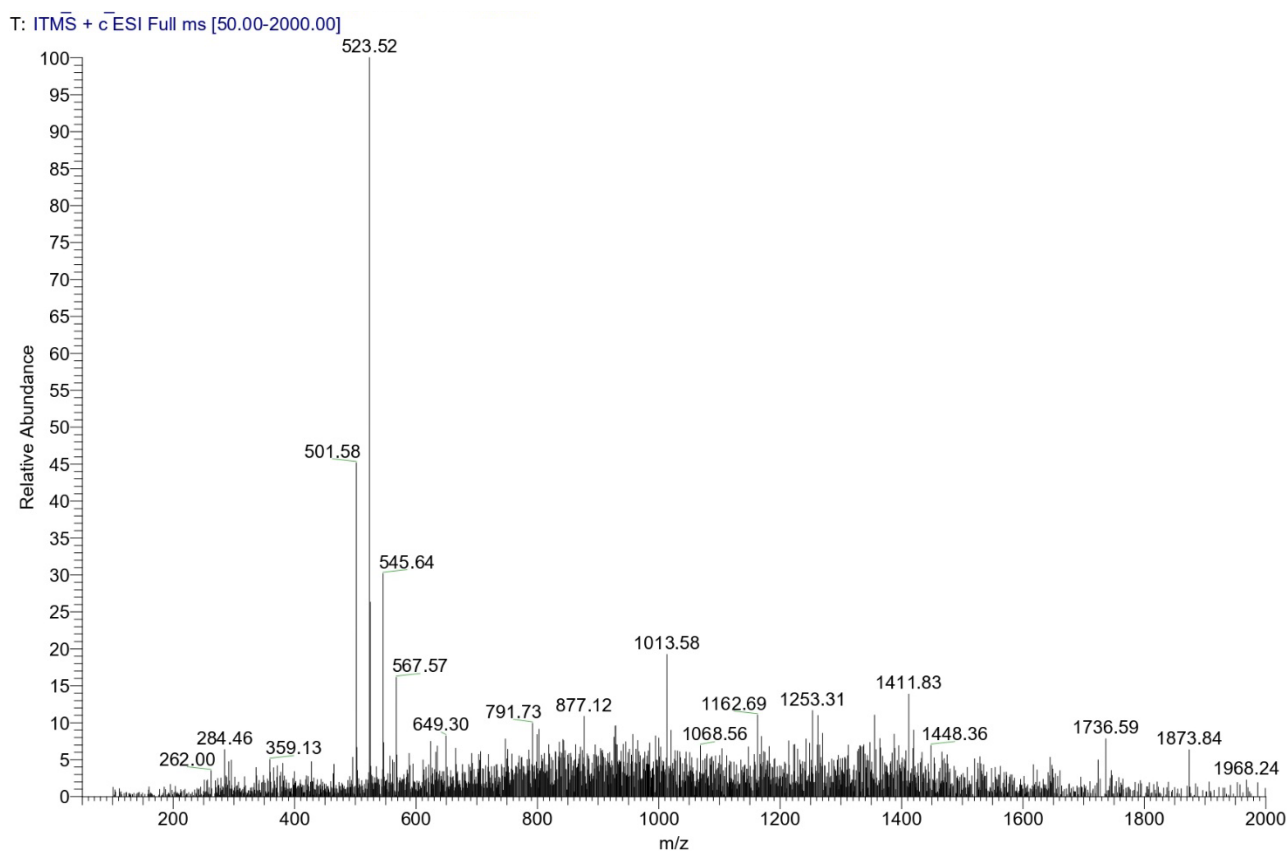

**Figure S15.** Mass spectra of in vitro digested NDRP carried out in positive ion mode.

9.6.  $^1\text{H}$  NMR of NDRP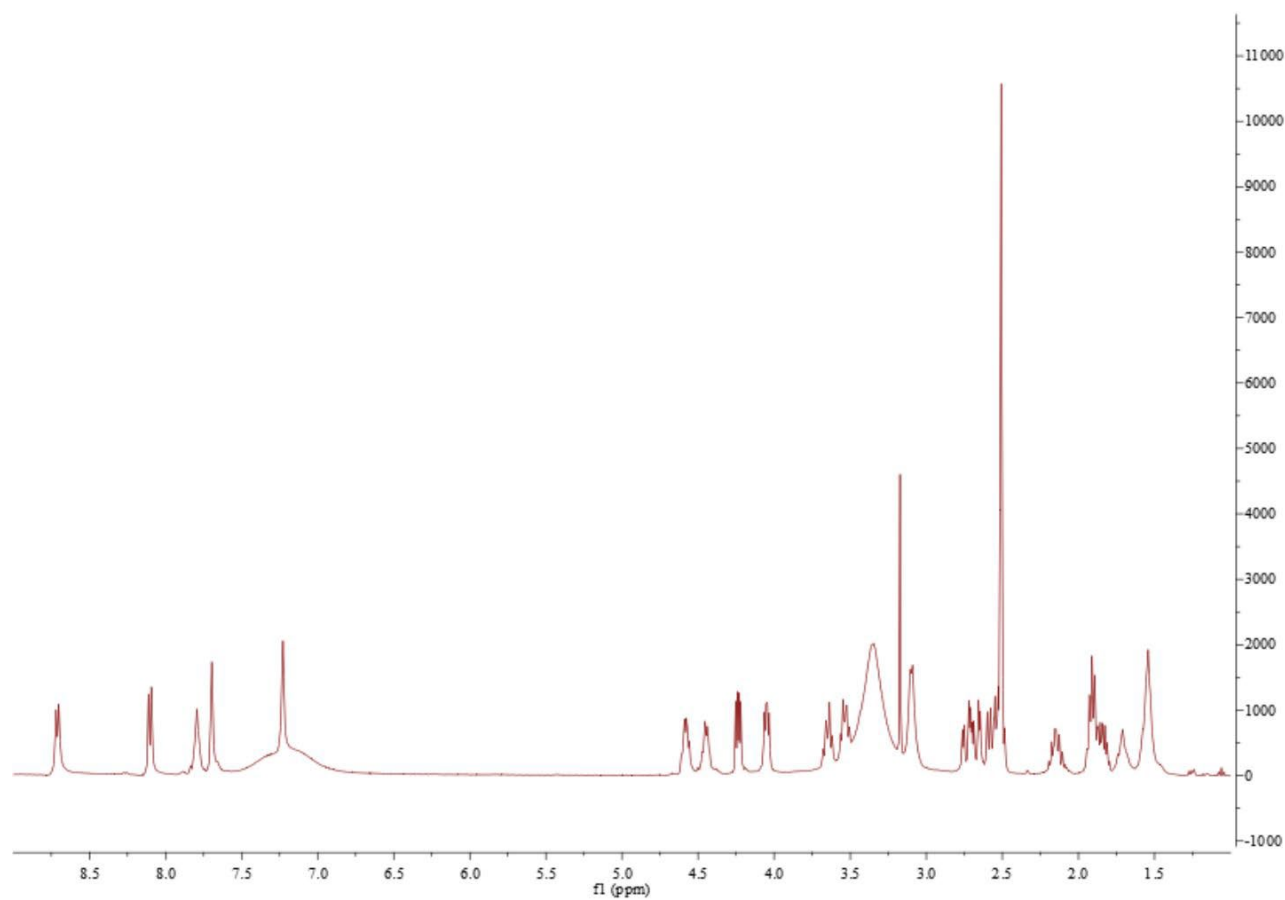**Figure S16.**  $^1\text{H}$  NMR (400 MHz) spectra of NDRP recorded in  $\text{DMSO-}d_6$ .

9.7.  $^{13}\text{C}$  NMR of NDRP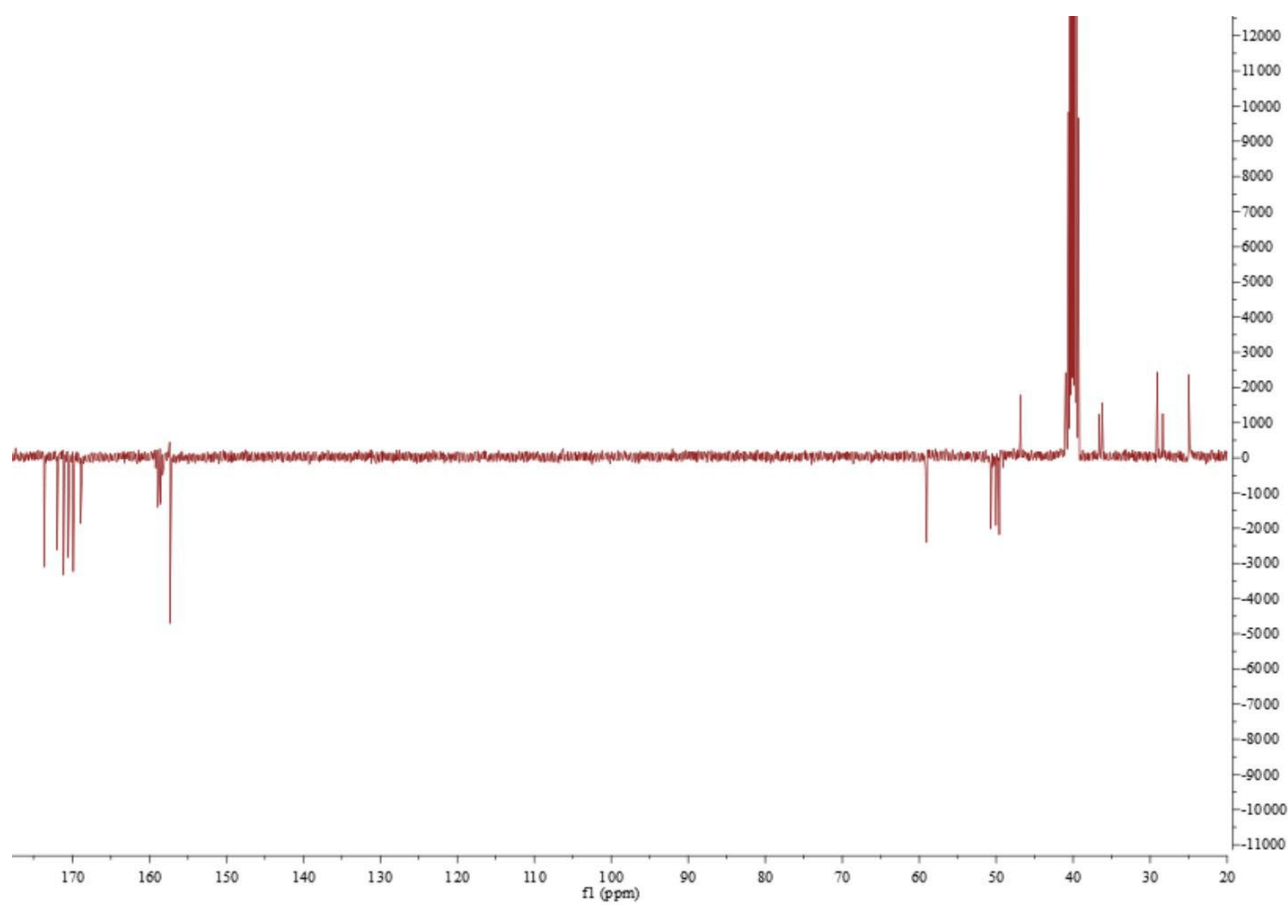

**Figure S17.**  $^{13}\text{C}$  NMR (101 MHz) spectra of NDRP recorded in  $\text{DMSO-}d_6$ .

### 9.8. NDRP HR-MS (Positive Detection)

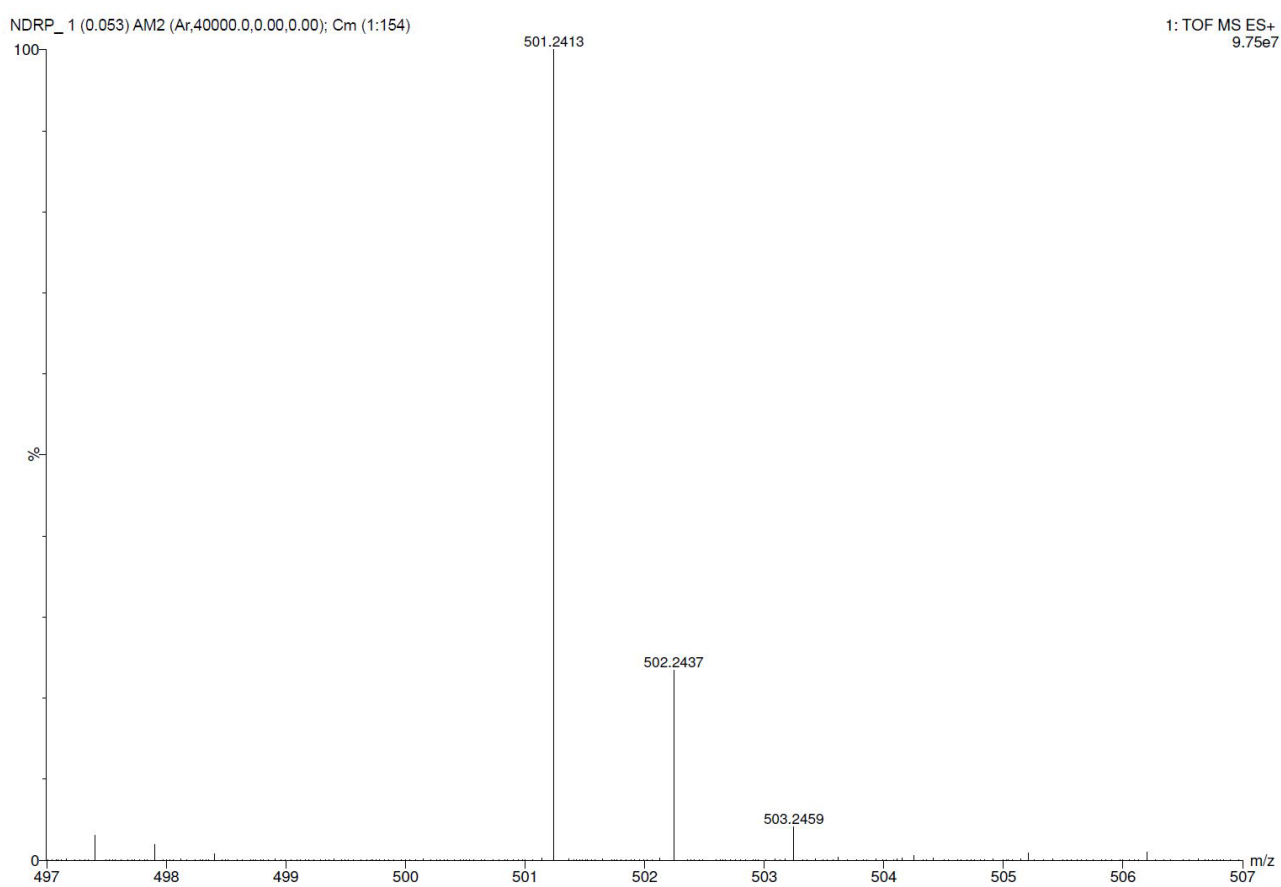

**Figure S18.** High-resolution ESI mass spectra (positive ion mode) of NDRP.
